# Supplementary material for: Predictors of post-TAVI conduction abnormalities in patients with bicuspid aortic valves
Source: HighWire-hosted journal article supplement (doi:10.1136/openhrt-2022-001995), 2022-07-01
Supplement: openhrt-2022-001995supp001_data_supplement.pdf [file openhrt-2022-001995supp001_data_supplement.pdf]

### **Supplementary figures**

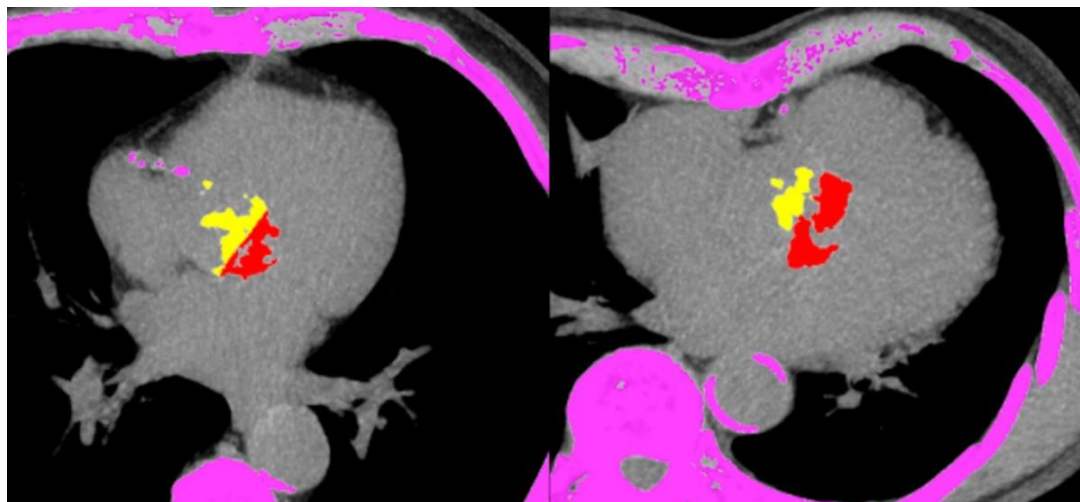

Supplementary figure 1: Non-contrast transverse view from the CT scan of two patients. The virtual line used to separate valve calcification adjacent to and opposite the MS can be seen running in a roughly 30-45 degree angle to the anterior-posterior axis of the body.

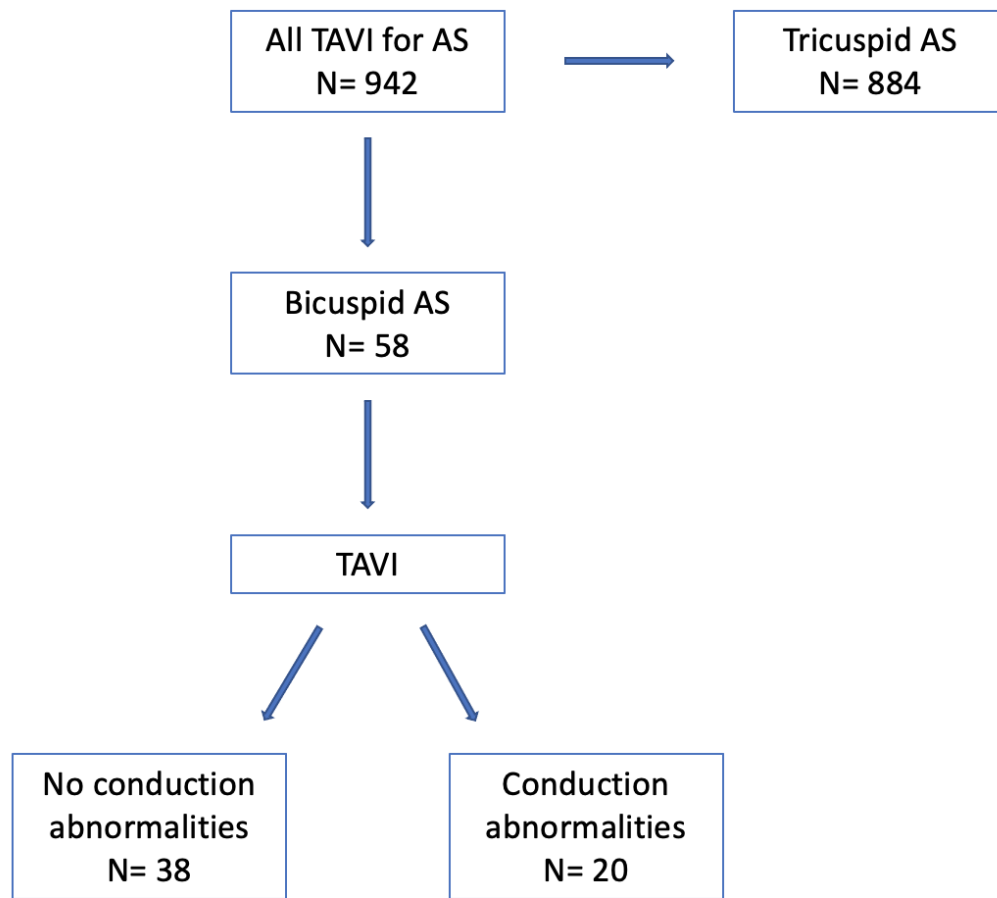

Supplementary figure 2: Study flow diagram.
