# Supplementary material for: Predictors of post-TAVI conduction abnormalities in patients with bicuspid aortic valves
Source: HighWire-hosted journal article supplement (doi:10.1136/openhrt-2022-001995), 2022-07-01
Supplement: openhrt-2022-001995supp002_data_supplement.pdf [file openhrt-2022-001995supp002_data_supplement.pdf]

**Supplementary tables**

| TAVI bioprosthesis type             |            | No Conduction<br>Abnormality (n = 38) | Conduction Abnormality<br>(n = 20) | P value |
|-------------------------------------|------------|---------------------------------------|------------------------------------|---------|
| <b>Balloon-expandable</b>           |            | 34 (89.5%)                            | 16 (80%)                           | 0.266   |
| <b>Self-expandable</b>              |            | 3 (10.5%)                             | 3 (15%)                            |         |
| <b>Mechanically-expandable</b>      |            | 0 (0%)                                | 1 (5%)                             |         |
| <b>Pre-TAVI balloon dilatation</b>  |            | 10 (26.3%)                            | 10 (50.0%)                         | 0.071   |
| <b>Post-TAVI balloon dilatation</b> |            | 3 (8.1%)                              | 3 (15%)                            | 0.654   |
| <b>Valve size<br/>(mm)</b>          | <b>20</b>  | 1 (2.6%)                              | 0 (0.0%)                           | 0.112   |
|                                     | <b>23</b>  | 12 (31.6%)                            | 5 (25.0%)                          |         |
|                                     | <b>25</b>  | 0 (0.0%)                              | 3 (15.0%)                          |         |
|                                     | <b>26</b>  | 14 (36.8%)                            | 4 (26.7%)                          |         |
|                                     | <b>29</b>  | 10 (26.3%)                            | 8 (40.0%)                          |         |
|                                     | <b>34</b>  | 1 (2.6%)                              | 0 (0.0%)                           |         |
| <b>Valve size<br/>(mm)</b>          | <b>≤25</b> | 13 (34.2%)                            | 12 (40.0%)                         | N/A     |
|                                     | <b>≥26</b> | 25 (65.8%)                            | 20 (60.0%)                         |         |

Supplementary table 1: Comparison of TAVI bioprosthesis type between patients with and without CA

| Variable                                                                        | OR | 95% CI for OR |             | P value |
|---------------------------------------------------------------------------------|----|---------------|-------------|---------|
|                                                                                 |    | Lower limit   | Upper limit |         |
| <b>DLZ calcification adjacent to MS<br/>without low <math>\delta</math>MSID</b> | 4  | 0.299         | 53.468      | 0.295   |
| <b>low <math>\delta</math>MSID without DLZ<br/>calcification adjacent to MS</b> | 6  | 0.643         | 55.948      | 0.116   |
| <b>low <math>\delta</math>MSID &amp; DLZ calcification<br/>adjacent to MS</b>   | 36 | 3.193         | 405.897     | 0.004   |

Supplementary table 2: Univariate logistic regression comparing the association of different combinations of the risk factors for the outcome of post-TAVI conduction abnormality. Low  $\delta$ MSID defined as <1.25mm. MS- membranous septum,  $\delta$ MSID- difference between MS and implantation depth, DLZ- device landing zone.
